# Supplementary material for: Immunogenic dead cells engineered by the sequential treatment of ultraviolet irradiation/cryo-shocking for lung-targeting delivery and tumor vaccination
Source: Royal Society of Chemistry journal article supplement (doi:10.1039/d3bm00854a), 2023-11-10
Supplement: d3bm00854a1.pdf [file d3bm00854a1.pdf]

## Supporting Information

Immunogenic dead cell engineered by sequential treatments of ultraviolet irradiation/cryo-shocking for lung-targeting delivery and tumor vaccination

Jing Zang<sup>1</sup>, Jinniu Zhang<sup>1</sup>, Yijun Mei<sup>2</sup>, Yaoxuan Xiong<sup>1</sup>, Tianyuan Ci<sup>1\*</sup>, Nianping Feng<sup>1\*</sup>

*Affiliation 1, School of Pharmacy, Shanghai University of Traditional Chinese Medicine, Shanghai, 201203, China*

*Affiliation 2, School of Pharmacy, China Pharmaceutical University, Nanjing, Jiangsu province, 210009, China*

\* Corresponding authors: Nianping Feng, Tianyuan Ci

Email: npfeng@shutcm.edu.cn (Nianping Feng), tianyuanci@shutcm.edu.cn (Tianyuan Ci)

### **This PDF file includes:**

Figure S1. CRT expression of Lewis cells after UV irradiation. Data were shown as mean  $\pm$  S.D. ( $n = 6$ ).

Figure S2. Viability of Lewis cells after UV irradiation of different exposure doses. Data were shown as mean  $\pm$  S.D. ( $n = 5$ ).

Figure S3. Cell morphology after UV irradiation at indicated irradiation intensities. Scale bar, 20  $\mu\text{m}$ .

Figure S4. Particle size of HCPT/Lip and QS-21/Lip in PBS after storing at 4°C Data were shown as mean  $\pm$  S.D. ( $n = 3$ ).

Figure S5. SEM image of HCPT&QS-21/UV-Cryo cell. Scale bar, 2  $\mu\text{m}$ .

Figure S6. Ki67 and TUNEL staining assay of lungs. Scale bar, 100  $\mu\text{m}$ .

Table S1. Hydrodynamic size,  $\zeta$ -potential, entrapment efficiency (EE) and drug loading (DL) of HCPT-loaded liposomes. Data were shown as mean  $\pm$  S.D. ( $n = 3$ ).

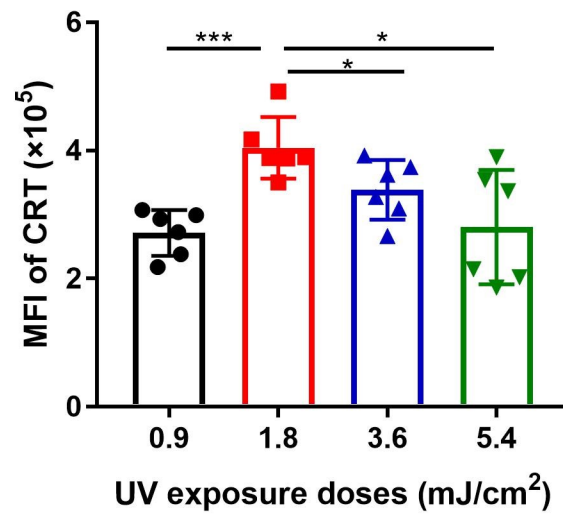

**Fig. S1** CRT expression of Lewis cells after UV irradiation. Data were shown as mean  $\pm$  S.D. ( $n = 6$ ). \* $P < 0.05$  and \*\*\* $P < 0.001$ .

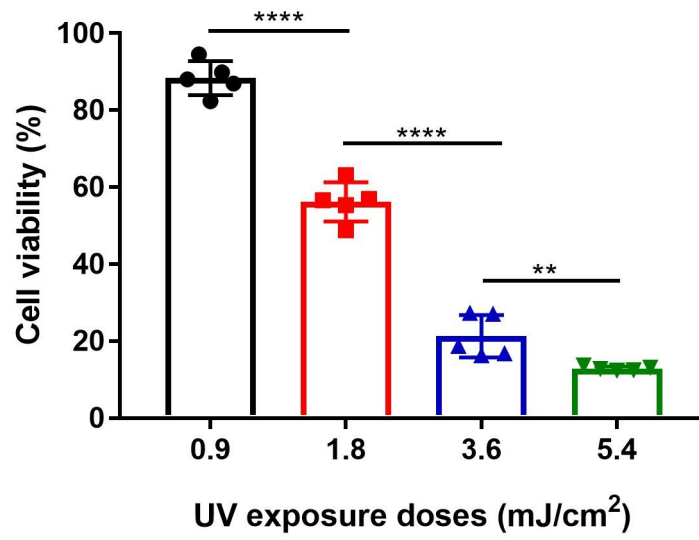

**Fig. S2** Viability of Lewis cells after UV irradiation of different times. Data were shown as mean  $\pm$  S.D. ( $n = 5$ ). \*\* $P < 0.01$  and \*\*\*\* $P < 0.0001$ .

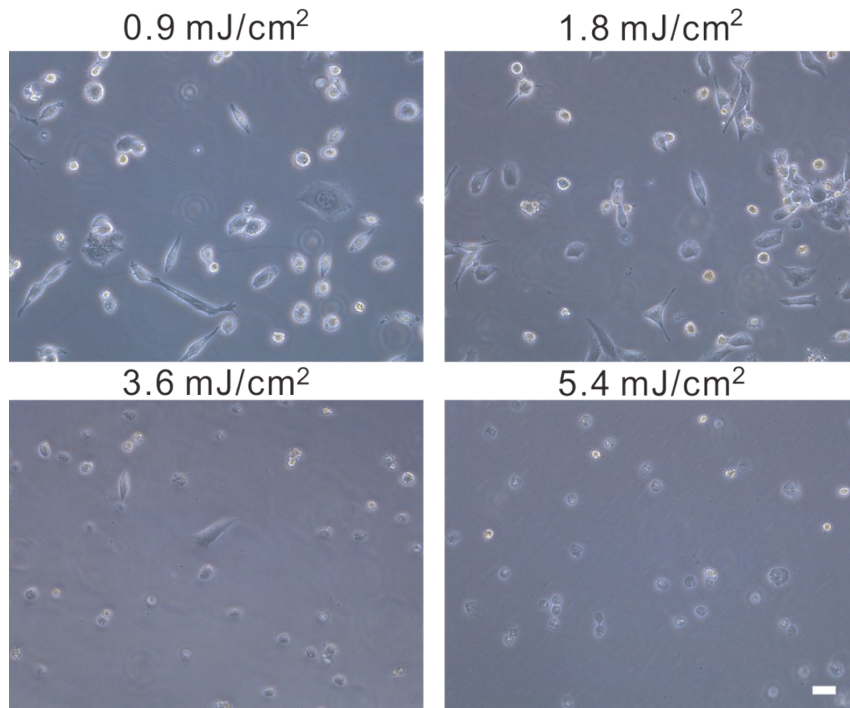

**Fig. S3** Changes of cell morphology after UV irradiation at indicated irradiation intensities. Scale bar, 20  $\mu\text{m}$ .

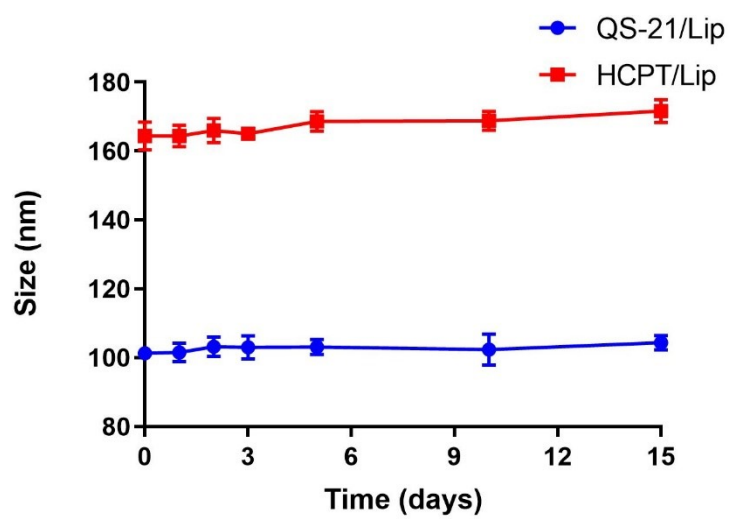

**Fig. S4** Particle size of HCPT/Lip and QS-21/Lip in PBS after storing at 4°C. Data were shown as mean  $\pm$  S.D. ( $n = 3$ ).

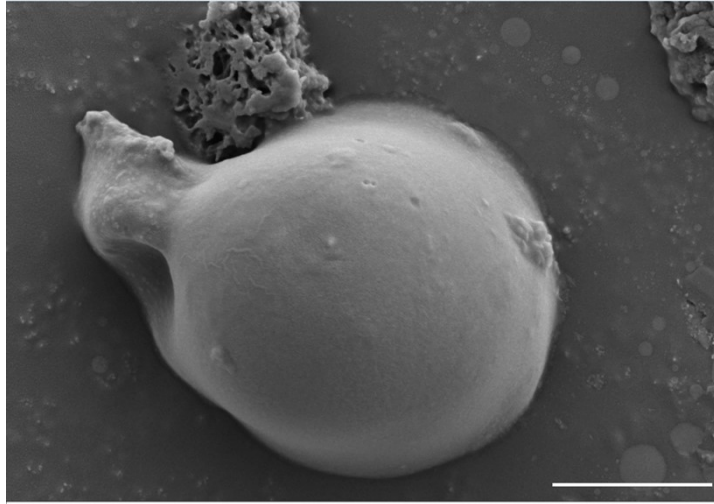

**Fig. S5** SEM image of HCPT&QS-21/UV-Cryo cell. Scale bar, 2  $\mu\text{m}$ .

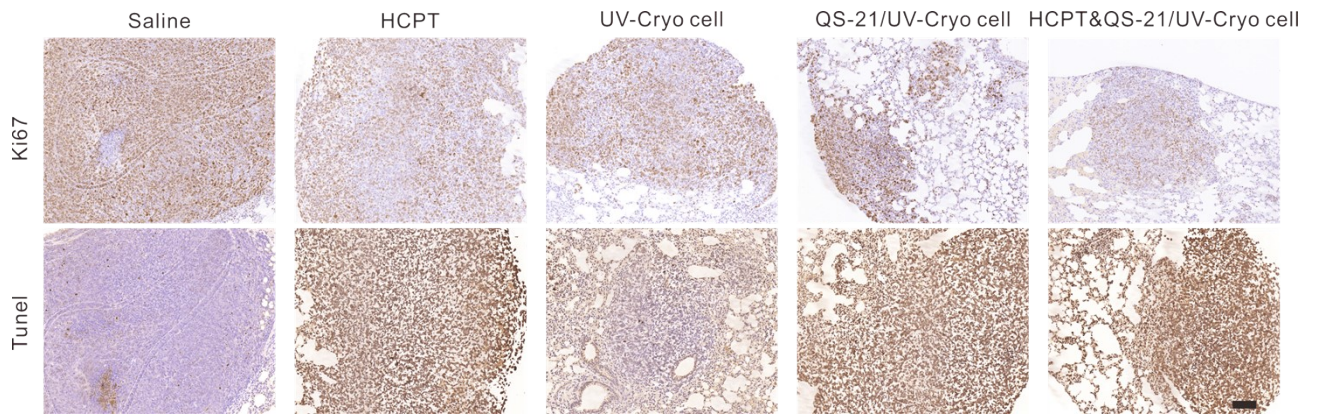

**Fig. S6** Ki67 and TUNEL staining assay of lungs. Scale bar, 100  $\mu$ m.

**Tab. S1** Physical characterizations of HCPT/Lip ( $n = 3$ ).

| Size (nm)       | $\zeta$ -potential (mV) | EE (%)         | DL (%)        |
|-----------------|-------------------------|----------------|---------------|
| $163.7 \pm 4.1$ | $19.9 \pm 0.7$          | $68.2 \pm 3.5$ | $6.2 \pm 0.3$ |
